# Supplementary material
Source: ML conference proceedings conference paper supplement (https://proceedings.mlr.press/v130/camuto21a.html)
Supplement: Supplementary file 1 [file camuto21a-supp.zip]

Archive with 5 entries (4 files):
- TowardsaTheoreticalUnderstandingoftheRobustnessofVariationalAutoencodersSupplementNC/
- TowardsaTheoreticalUnderstandingoftheRobustnessofVariationalAutoencodersSupplementNC/.DS_Store
- __MACOSX/TowardsaTheoreticalUnderstandingoftheRobustnessofVariationalAutoencodersSupplementNC/._.DS_Store
- TowardsaTheoreticalUnderstandingoftheRobustnessofVariationalAutoencodersSupplementNC/Appendix.pdf
- __MACOSX/TowardsaTheoreticalUnderstandingoftheRobustnessofVariationalAutoencodersSupplementNC/._Appendix.pdf
